# Supplementary material
Source: publisher site journal article supplement (https://www.dovepress.com/article/201276)
Supplement: Supplementary file 1 [file get_supplementary_file.php]

**Supplementary materials**

**Pharmacogenetics of pediatric asthma: current perspectives**

Javier Perez-Garcia1 - jpegarci@ull.edu.es

Antonio Espuela-Ortiz1 - aespuela@ull.edu.es

Fabian Lorenzo-Diaz1,2 - florenzo@ull.edu.es

Maria Pino-Yanes1,3,4* - mdelpino@ull.edu.es

1Genomics and Health Group, Department of Biochemistry, Microbiology, Cell Biology and Genetics, Universidad de La Laguna, San Cristóbal de La Laguna, Santa Cruz de Tenerife, Spain

2Instituto Universitario de Enfermedades Tropicales y Salud Pública de Canarias (IUETSPC), Universidad de La Laguna, San Cristóbal de La Laguna, Santa Cruz de Tenerife, Spain

3CIBER de Enfermedades Respiratorias, Instituto de Salud Carlos III, Madrid, Comunidad de Madrid, Spain

4Instituto de Tecnologías Biomédicas (ITB), Universidad de La Laguna, San Cristóbal de La Laguna, Santa Cruz de Tenerife, Spain

**Correspondence**: Maria Pino-Yanes

Genomics and Health Group, Department of Biochemistry, Microbiology, Cell Biology and Genetics

Universidad de La Laguna

Apartado 456, San Cristóbal de La Laguna

38200 Santa Cruz de Tenerife

Spain

Tel.: +34 922316 502 – 6343

Email: [mdelpino@ull.edu.es](mailto:mdelpino@ull.edu.es)

**Table S1.** Group of keywords used in literature research.

| **Keyword 1** | **Keyword 2** | **Keyword 3** | **Keyword 4** |
| --- | --- | --- | --- |
| asthma | children | pharmacogenomics | ICS |
|  | pediatric | pharmacogenetics | corticosteroids |
|  |  | gene | steroids |
|  |  | polymorphism | OCS |
|  |  | GWAS | LABA |
|  |  |  | SABA |
|  |  |  | adrenergic |
|  |  |  | BDR |
|  |  |  | bronchodilator |
|  |  |  | LTRA |
|  |  |  | leukotriene |
|  |  |  | SAMA |
|  |  |  | LAMA |
|  |  |  | muscarinic |
|  |  |  | antihistamine |
|  |  |  | theophylline |
|  |  |  | mepolizumab |
|  |  |  | omalizumab |

The literature research was performed in PubMed using different combinations of keywords from each group. Results were filtered by publishing date, from January 1, 2018, to December 31, 2019.

**Table S2.** General description of the cohorts included in the studies.

| **Study** | **Cohort acronym** | **Description** |
| --- | --- | --- |
| Scaparrotta et al1 | NA | Patients were recruited from the Allergy and Respiratory Unit, Pediatric Department, Department of Medicine and Aging Sciences of ‘‘G. d’Annunzio’’ University of Chieti Pescara, Italy, between February and April 2017. Inclusion criteria were as follows: age between 6 and 17 years; Caucasian ethnicity; diagnosis of asthma according to most recent Global Initiative for Asthma (GINA) guidelines; being diagnosed with asthma for at least 1 year and available follow-up clinical data and collection of at least three spirometries, performed at separate visits; ICS therapy with fluticasone dipropionate. Exclusion criteria were as follows: congenital abnormalities and/or malformations; bronchopulmonary dysplasia and/or chronic lung diseases different from asthma; chronic systemic and inflammatory diseases; neoplastic disorders (past or current); chemotherapy or radiotherapy; HIV, and B and C hepatitis.1 |
| Dragicevic et al2 | NA | This study has encompassed 127 children with asthma who were diagnosed and treated at the Private Practice Cebelica in Maribor, Slovenia, over a period of 12 consecutive months.2 |
| Jovicic et al3 | NA | The cross-section study was conducted at the University Children’s Hospital in Belgrade during the period from October 2016 to May 2017 and included 54 children of Serbian ethnicity with asthma (6-18 years old). The diagnosis of asthma and disease severity were set in accordance with the GINA 2016 guidelines. Children with asthma who had some other illnesses that may affect lung function were excluded from the study, as well as children with any chronic disease other than asthma such as bronchopulmonary dysplasia, tracheobronchial malacia and/or congenital heart disease. None of the subjects had acute exacerbation of asthma.3 |
| Toraih et al4 | NA | This study was conducted in two groups: asthma individuals: 75 patients diagnosed with bronchial asthma, and control group: 100 age-matched healthy controls. Asthmatic patients (3-15-years-old) were recruited from the Pediatrics and the Allergy and Immunology clinics of the Suez Canal University Hospital, Ismailia, Egypt, from March 2017 to August 2017. Asthmatic patients were diagnosed according to the GINA. Comorbidities, levels of asthma symptom control over the last 4 weeks, disease severity, therapeutic level and response, and adherence to treatment were assessed based on GINA guidelines. Chest radiographs were acquired to exclude other causes of airflow limitation. Asthmatic patients with chronic comorbidities, with manifestations of acute respiratory infection within 3 weeks, on systemic steroids within 2 weeks, or non-compliant to treatment were excluded from the study. Control subjects were healthy children who accompanied their sibs to the Pediatrics Clinic and had no previous history of atopy or chronic airway disease.4 |
| Sordillo et al5 | CAMP | CAMP was a randomized, placebo-controlled trial of budesonide, nedocromil, or placebo for mild-to-moderate childhood asthma followed by three phases of observational follow-up; the trial and all follow-up phases included pre-bronchodilator and post-bronchodilator spirometry. A total of 1041 children, 5-12 years of age, were enrolled in the trial between December 1993 and September 1995. Inclusion was restricted to children with a history of chronic asthma who, during a 28-day run-in period, had asthma symptoms or a low morning peak flow on eight or more days; inclusion also required a methacholine challenge with a concentration of 12.5 mg/mL or less that resulted in a reduction in FEV1 by at least 20% (since airway responsiveness is determined by the provocative concentration of methacholine required to reduce the FEV1 by at least 20% [methacholine PC20], with higher values indicating less airway responsiveness).5 |
| Spear et al6 | SAGE & SAGE II | The Study of African Americans, Asthma, Genes & Environments (SAGE) is an ongoing case–control study of asthma in children and adolescents recruited from the San Francisco Bay Area in California. Subjects were eligible if they were 8–21 years of age and self-identified all four grandparents as African American. Exclusion criteria included: (1) 10 or more pack-years of smoking; (2) any smoking within 1 year of recruitment date; (3) pregnancy in the third trimester; or (4) history of one of the following conditions: sickle cell disease, cystic fibrosis, sarcoidosis, cerebral palsy, or history of heart or chest surgery. Asthma was defined by physician diagnosis, asthma medication use and reported symptoms of coughing, wheezing or shortness of breath in the 2 years preceding enrollment. Detailed clinical measurements were recorded for each individual whom DNA was collected from.6 |
| GALA II | A total of 1830 Latino children (8-21 years old) with asthma genotyped with the Axiom LAT1 array (World Array 4, Affymetrix) for the Genes-environments and Admixture in Latino Americans (GALA II) study were included in the analysis. Exclusion criteria included: (1) 10 or more pack-years of smoking; (2) any smoking within 1 year of recruitment date; (3) pregnancy in the third trimester; or (4) history of one of the following conditions: sickle cell disease, cystic fibrosis, sarcoidosis, cerebral palsy, or history of heart or chest surgery. Asthma was defined by physician diagnosis, asthma medication use and reported symptoms of coughing, wheezing or shortness of breath in the 2 years preceding enrollment. Detailed clinical measurements were recorded for each individual whom DNA was collected from.6 |
| GALA I | GALA I is a family-based cohort with general eligibility criteria similar to GALA II study. Subjects were included in the study if they were between the ages of 8 and 40 with physician diagnosed mild to moderate-severe asthma and had experienced two or more symptoms during the 2 years preceding time of recruitment (including wheezing, coughing and/or shortness of breath).6 |
| SAPPHIRE | A total of 1325 Africans Americans with asthma from the Study of Asthma Phenotypes and Pharmacogenomic Interactions by Race-Ethnicity SAPPHIRE genotyped with the Genome-Wide Human SNP Array 6.0 (Affymetrix) were included. Subjects met the following criteria: age 12–56 years, had a diagnosis of asthma (based on both patient report and documentation in the medical record), did not have a prior diagnosis of chronic obstructive pulmonary disease or congestive heart failure, a baseline FEV1 between 40 and 90% predicted, > 12% baseline bronchodilator reversibility, no smoking in the preceding year or < 10 pack-year smoking history total, no oral or inhaled corticosteroid use in the 4 weeks preceding screening, and not pregnant at the time of enrollment and not intending to get pregnant during the study period.6 |
| SARP | A total of 290 African Americans with mild to severe asthma from the Severe Asthma Research Program (SARP) genotyped with the Illumina 1Mv1 platform were included. SARP is a comprehensively characterized cohort with a range of asthma severities from mild to severe but was enriched for severe disease defined by the ATS criteria for refractory asthma. Subjects met the definition of severe persistent asthma. A physician’s diagnosis of asthma was confirmed by evidence of methacholine bronchial hyperresponsiveness or bronchodilator reversibility and documented asthma symptoms.6 |
| Mak et al7 | SAGE II/GALA II | General eligibility criteria of SAGE II and GALA II studies is described above. A total of 1,500 samples were selected from GALA II and SAGE II, with 500 samples each from Puerto Ricans, Mexicans and African Americans. For each population, 250 samples from the tails of the BDR distribution were selected (ie, 250 high responders and 250 low responders).7 |
| Kachroo et al8 | GACRS | The study included asthmatic children aged 6-14 years from the Genetic Epidemiology of Asthma in Costa Rica (GACRS) family-based trios and probands from extended pedigrees, which was recruited from a genetically homogenous Hispanic population isolate in the Central Valley of Costa Rica. Unrelated children were eligible if they had a high probability of having at least 6 great grandparents born in the Central Valley of Costa Rica and they had asthma; defined as physician-diagnosed asthma plus a history of at least two episodes of troublesome lung symptoms or asthma attacks in the prior year. Children diagnosed with asthma in this cohort were also evaluated for the presence of airway hyperresponsiveness utilizing a methacholine challenge.8 |
| Sood et al9 | NA | Participants were recruited at the Center for Applied Genomics at The Children’s Hospital of Philadelphia Asthma cases were defined as children older than 4 and younger than 18 years of age who received an ICD-9 asthma code (493.*) on at least two separate calendar days as well as documented prescription(s) for at least one asthma-related medication. Only asthmatics evaluated in allergy or pulmonology clinics were included. Children were excluded if they had evidence of chronic lung disease defined by ICD-9 codes 238.77, 273.4, 277.xx, 415.x, 416.x, 478.3xx, 478.5, 492.xx, 494.xx, 495.2, 496.xx, 714, 748.5, 769.xx, 996.8, E878.0, V81.3, V42, V49.83, and V58.44, or if not evaluated in a subspecialty clinic after 2007 (i.e. before NHLBI guidelines). If a BMI greater than 40 was recorded at any point, cases were excluded.9 |
| Alghobashy et al10 | NA | This study included 104 asthmatic children diagnosed and assessed for severity according to the recently established guidelines of the GINA 2006. Their age ranged from 6 to 12 years to ensure that the child could understand and perform the pulmonary function maneuvers efficiently. The asthmatic children were stable clinically at the examination and were divided into two groups. Group I included 52 children with mild intermittent asthma treated with selective beta 2 agonists as salbutamol or terbutaline mostly in inhalation form or in a few cases in oral form three times daily. Group II included 52 cases of persistent asthma treated with ICSs with long-acting beta 2 agonists. The cases in this group were classified into mild persistent, moderate persistent, and severe persistent asthma according to the GINA guidelines. The control group (Group III) included 52 healthy children selected from the pediatrics outpatient clinics that came for nonrespiratory complaints. The controls had no history of asthma or any allergic diseases and they all had normal lung function tests. Exclusion criteria: All children with age below 6 years, other allergic disorders, any chronic disease other than asthma that may affect pulmonary function, the restrictive pattern in Spirometry, or diseases associated with β2 agonist receptor polymorphism such as rheumatoid arthritis, hypertension, and obesity were excluded from the study. None of the subjects had received antihistamines or systemic corticosteroids in the last 3 weeks.10 |
| Farzan et al11 | BAMSE | Between February 1994 and November 1996, parents of all newborn children (n=7221), living in certain areas of northern and central Stockholm, were asked to participate in the study. Inner city, urban and suburban districts were represented in the study area, which included areas with different types of buildings and socio‐economic status (education and profession) of the parents. Access to a community population register ensured that the parents of all infants born in the area during the period under study were included. However, 477 could never be reached and another 1,256 children were actively excluded, according to the following exclusion criteria: the family planned to move within 1 year of the study start; insufficient knowledge of the Swedish language; the family had a seriously ill child; or an older sister or brother was already included in the study. 12 In the current study, Non-Hispanic white children at the age of 8 years with physician-diagnosed and parental-reported asthma were included in the analysis.11 |
| BREATHE | BREATHE is an observational study and included physician-diagnosed asthmatic children/young adults (age: 3-22 years), through primary and secondary health centers in either Tayside or Dumfries (Scotland, United Kingdom). The majority of the patients were considered to be non-Hispanic whites.11 |
| CAMP | CAMP general eligibility criteria are described above. In this study, patients with the self-identified non-Hispanic white of European origin were analyzed.11 |
| COPSAC2000 | COPSAC is a single-center, prospective birth cohort study. Women from the greater Copenhagen area who reported a history of asthma were invited to receive further information about the COPSAC. Also, pregnant women with asthma who were attending prenatal clinics were invited. Women who indicated an interest in the study were interviewed by telephone regarding eligibility criteria, including fluency in Danish, a physician’s diagnosis of asthma after the age of 7 years, and a history of daily treatment with inhaled 2-agonists or glucocorticoids for a minimum of 2 weeks during 2 seasons or continuously for 1 year. Eligible women subsequently received information by mail. Women reconfirming an interest were invited to the COPSAC Clinical Research Unit (CRU) for detailed information. Women who provided informed consent received guidance on cord blood sampling. Infants of consenting mothers were enrolled in the cohort at the CRU visit 1 month after birth, excluding infants with a severe congenital anomaly, a gestational age younger than 36 weeks, a need for mechanical ventilation, or a lower respiratory tract infection.13 For this study, self-reported non-Hispanic whites were included in the analyses.11 |
| ESTATe | The Effectiveness and Safety of Treatment with Asthma Therapy in children (ESTATe) is a case-control study that includes children and young adults (4-19 years) with a physician diagnosis of asthma recruited from primary care practices in the Netherlands. Patients were selected from either IPCI (Interdisciplinary Processing of Clinical Information) database or the PHARMO Database Network. Both databases contain the electronic medical records of more than one million patients throughout the Netherlands with detailed information on patient diagnosis, patient prescription (IPCI) or patient dispensing (PHARMO). During the study period (2000 -2012) all children with asthma, aged 5 years and older and treated with asthma controller therapy were selected.14 Self-reported non-Hispanic whites were included in the analyses.11 |
| followMAGICS | FollowMAGICS is the follow-up phase of the observational Multicenter Asthma Genetics in Childhood Study (MAGICS). All children were initially recruited at secondary and tertiary centers from Germany and Austria after physician’s diagnosis of asthma. During the follow-up phase of the same children and young adults (followMAGICS), now aged 7 to 25 years, persistence of asthma symptoms was queried using a patient questionnaire. The patients were self-reported non-Hispanic whites and their ethnicity was further validated through principal component analysis using genome-wide genotyping data.11 |
| GALA II | GALA II general eligibility criteria are described above. |
| HPR | The Study of asthma in Puerto Rican children (HPR) (the United States, age: 6-17 years), is a case-control study including patients from tertiary care. Asthma was defined based on physician diagnosis and symptoms or medication use in the past 12 months. All participants had to have four Puerto Rican grandparents.11 |
| PACMAN | Pharmacies will be selected from the Utrecht Pharmacy Panel for Education and Research (UPPER). UPPER is an electronic network of pharmacists (>1400) who are interested in cooperating in epidemiologic or pharmaceutical research. UPPER also coordinates internships for pharmacy education. Children will be selected from pharmacies in different regions (urban, rural, city center) in The Netherlands according to the following inclusion criteria: aged 4-12 years; at least 2 years of medication history available from the pharmacy information system; at least 3 prescriptions for any asthma drug (ATC code R03) within the last 2 years and at least 1 prescription in the last 6 months.15 In this study, non-Hispanic white patients were included in the analyses.11 |
| PAGES | This is a cross-sectional study of asthmatic children attending hospital clinics across Scotland and Brighton, England. Asthma is defined as a recurrent wheezing condition diagnosed as asthma by a consultant pediatrician who is a member of the Scottish Pediatric Respiratory Interest Group. All asthmatic children aged 2-16 years attending a clinic between March 2008 and November 2011 will be eligible. Exclusion criteria include children with coexisting respiratory morbidity, for example, cystic fibrosis, bronchopulmonary dysplasia (BPD), and the following significant non-respiratory problems, cerebral palsy, Down's syndrome, gastro-esophageal reflux (prescribed medications) and marked developmental delay. Children born prematurely but who did not have BPD are eligible; premature delivery is noted in the questionnaire.16 For this study, patients with self-reported ancestry other than non-Hispanic white were excluded.11 |
| PASS | Participants included in this cohort were recruited from November 2008 to September 2011 from 25 sites in the UK. Eligibility criteria were as follows: treatment with ICS >6 months; diagnosis of asthma; under care of a pediatrician experienced in the treatment of asthma; clinical concern about adrenal suppression sufficient to warrant a LDSST or participant in EMSC study; age 5–18 years. Exclusion criteria were as follows: Type 1 or Type 2 diabetes; competent older participant declining assent. Study participants were recruited either prospectively (if LDSST not yet undertaken) or retrospectively (if LDSST already undertaken). If not already performed, the LDSST was undertaken at the study visit. All clinical data collected for retrospective PASS patients relates to the period prior to undertaking the LDSST. The ethnicity of two patients was self-reported mixture of non-Hispanic white and another ancestry, the remaining were self-reported non-Hispanic whites, all validated through principal component analysis from genome-wide genotyping data.17 |
| SAGE II | SAGE II general eligibility criteria are described above. |
| SCSGES | The Singapore Cross-Sectional Genetic Epidemiology Study (SCSGES) (Singapore, age: 6-31 years) is an on-going cross-sectional genetic epidemiology study on allergic diseases among Singapore Chinese individuals. Self-identified Chinese ethnicity was further validated through principal component analysis from genome-wide genotyping data. Volunteers, including asthmatic and non-asthmatic individuals, were recruited from two different recruitment centers within Singapore. Asthma was defined by physician diagnosis and report of symptoms in the year preceding enrollment. In this study, patients up to 25 years of age were included.11 |
| SLOVENIA | SLOVENIA is a case-control study including children and young adults with mild and moderate persistent asthma aged 5 to 18 years old of Slovenian origin recruited from tertiary health centers. Asthma was defined by physician diagnosis and hospital records according to American Thoracic Society (ATS) criteria. Forced expiratory volume in 1 second (FEV1) expressed as a percentage of predicted value for sex, height and age was measured before therapy and 6 weeks after treatment with the use of a Vitalograph 2150 spirometer (Compact, Buckingham, UK) according to ERS/ATS guidelines. ICS was regularly administered to part of the asthmatic patients included in the study. Patients with other chronic inflammatory diseases except for those with asthma and atopic diseases and asthmatics treated with other asthma medications were excluded from the study.18 Patients were self-identified Central European Caucasians of Slavic origin.11 |
| Dijk et al 14 | PACMAN | PACMAN general eligibility criteria are described above |
| GALA II | GALA II general eligibility criteria are described above. Only children with a physician-diagnosis of asthma that reported active symptoms and use of asthma medication during the 12 months preceding the study enrollment were analyzed in the current study.14 |
| SAGE | SAGE general eligibility criteria are described above. |
| SLOVENIA | In the SLOVENIA cohort, 224 children aged 5–18 years were selected. Asthma was diagnosed according to American Thoracic Society (ATS) criteria. Children were included with mild or moderate persistent asthma newly detected in this period. Data on asthma symptoms, exacerbations and clinical parameters were obtained during the physician visit over the preceding 12 months.14 |
| ESTATe | ESTATe general eligibility criteria are described above. Within this cohort, cases with an asthma exacerbation were selected (use of systemic corticosteroids, ER visit or hospitalization because of asthma) and each case to 4 controls on age, sex, general practice (GP), and type of asthma controller therapy were matched. Next, all potential cases and controls were invited to participate via their respective GP.14 |
|  | **General criteria of the study by Djik et al:** categorization of asthma severity was modified from the British Thoracic Society (BTS) guidelines as follows in all studies: step 1: inhaled short-acting b2-agonists (SABA) as needed, step 2: step 1 plus use of inhaled SABA as needed plus regular ICS, step 3: step 2 plus regular long-acting inhaled b2-agonists (LABA) or plus leukotriene receptor antagonists (LTRA), and step 4: step 2 plus regular LABA and LTRA. For this study, patients on treatment step 2 or higher were included.14 |
| Karimi et al19 | PACMAN | PACMAN general eligibility criteria are described above. The study population for this analysis consisted of all asthmatic children treated with inhaled corticosteroids (ICS) and who also had FENO measurements, genotyping and questionnaire data.19 |
| Wan et al20 | NA | Inclusion criteria: (1) Children aged 5-14 years, male or female; (2) Either a positive bronchial hyperresponsiveness (i.e., inhaled ≤2.504 mg of methacholine causing ≥20% decrease in FEV 1) or a positive bronchodilator test (i.e., in the first 15 minutes after inhalation of 200-400 μg of salbutamol causing ≥12% increase in FEV 1); (3) Be able to perform reproducible spirometry during the medication; (4) Follow the doctors orders, regular medications, and follow-up visits. Exclusion criteria: (1) Acute asthma exacerbations or even hospitalization occurred in the past 4 weeks; (2) Used inhaled or systemic corticosteroids, theophylline, leukotriene antagonists or other adjuvant asthma therapy in the past 4 weeks; (3) Have a history of other lung diseases other than asthma, such as upper respiratory tract infection, pulmonary infection, chronic bronchitis, chronic obstructive pulmonary disease, etc.; (4) Cannot maintain treatment or regulate medications for some reason.20 |
| Hernandez-Pacheco et al18 | GALA II/SAGE II | GALA II and SAGE II general eligibility criteria are described above. Patients from the GALA II and SAGE studies with a physician diagnosis of asthma who reported having active symptoms and asthma medication use within the last year were analyzed in the discovery phase. Analyses were performed for a subset of 854 subjects from GALA II and 493 individuals from SAGE II.18 |
| followMAGICS | followMAGICS general eligibility criteria are described above. |
| PASS | PASS general eligibility criteria are described above. |
| PACMAN | PACMAN general eligibility criteria are described above. |
| ESTATe | ESTATe general eligibility criteria are described above. Within this study, cases with asthma exacerbations based on the use of systemic corticosteroids, emergency room (ER) visits or hospitalizations because of asthma were selected. Each case was matched to four controls based on similarity in age, gender, general practitioner (GP) and type of asthma controller therapy. Next, all potential cases and controls were invited to participate via their respective GP. If patients agreed to participate, they provided written consent, completed a research questionnaire including questions on asthma control and provided a saliva sample (for DNA extraction).18 |
| BREATHE | BREATHE general eligibility criteria are described above. |
| SLOVENIA | SLOVENIA general eligibility criteria are described above. |
| Levin et al21 | SAPPHIRE | SAPHHIRE general eligibility criteria are described above. The discovery group consisted of a subset of SAPPHIRE participants who completed 6 weeks of monitored ICS treatment, had existing genome-wide genotype data, and were African American by self-report (n=244). These subjects completed the Asthma Control Test (ACT), a validated 5-question instrument used for assessing asthma control in subjects 12 years of age or older (Optum, Eden Prairie, Minn) both before and after ICS treatment (320 mg of inhaled beclomethasone dipropionate hydrofluoroalkane daily 6 weeks). The validation group consisted of a subset of SAPPHIRE that met the following criteria: prospective clinical data on asthma exacerbations, recorded ICS fills through pharmacy claims records, existing genome-wide genotype data, and African American race-ethnicity by participant self-report. Lastly, another validation subset from the SAPPHIRE cohort (n=98) consisted of European American subjects who underwent the same ICS treatment protocol as the discovery set.21 |
| GALA II | GALA II general eligibility criteria are described above. |
| SAGE | SAGE II general eligibility criteria are described above. |
| Wang et al22 | CAMP | CAMP general eligibility criteria are described above. To minimize heterogeneity in population structure, this analysis was performed among the white subjects, the largest homogenous group in CAMP. Hence, 604 genotyped children were included in this analysis based on available genotype data.22 |

**References**

1. Scaparrotta A, Franzago M, Marcovecchio ML, et al. Role of THRB, ARG1, and ADRB2 Genetic Variants on Bronchodilators Response in Asthmatic Children. *J Aerosol Med Pulm Drug Deliv*. 2019;32(3):164-173.

2. Dragicevic S, Kosnik M, Divac Rankov A, et al. The Variants in the 3′ Untranslated Region of the Matrix Metalloproteinase 9 Gene as Modulators of Treatment Outcome in Children with Asthma. *Lung*. 2018;196(3):297-303.

3. Jovicic N, Babic T, Dragicevic S, Nestorovic B, Nikolic A. ADRB2 gene polymorphisms and salbutamol responsiveness in Serbian children with asthma. *Balk J Med Genet*. 2018;21(1):33-38.

4. Toraih EA, Hussein MH, Ibrahim A, et al. Beta2-adrenergic receptor variants in children and adolescents with bronchial asthma. *Front Biosci (Elite Ed)*. 2019;11:61-78.

5. Sordillo JE, McGeachie M, Lutz SM, et al. Longitudinal analysis of bronchodilator response in asthmatics and effect modification of age-related trends by genotype. *Pediatr Pulmonol*. 2019;54(2):158-164.

6. Spear ML, Hu D, Pino-Yanes M, et al. A genome-wide association and admixture mapping study of bronchodilator drug response in African Americans with asthma. *Pharmacogenomics J*. 2019;19(3):249-259.

7. Mak ACY, White MJ, Eckalbar WL, et al. Whole-Genome sequencing of pharmacogenetic drug response in racially diverse children with asthma. *Am J Respir Crit Care Med*. 2018;197(12):1552-1564.

8. Kachroo P, Hecker J, Chawes B, et al. Whole Genome Sequencing Identifies CRISPLD2 as a Lung Function Gene in Children with asthma. *Chest*. 2019;156(6):1068-1079.

9. Sood N, Connolly JJ, Mentch FD, et al. Leveraging electronic health records to assess the role of ADRB2 single nucleotide polymorphisms in predicting exacerbation frequency in asthma patients. *Pharmacogenet Genomics*. 2018;28(11):256-259.

10. Alghobashy AA, Elsharawy SA, Alkholy UM, et al. B 2 adrenergic receptor gene polymorphism effect on childhood asthma severity and response to treatment. *Pediatr Res*. 2018;83(3):597-605.

11. Farzan N, Vijverberg SJ, Hernandez-Pacheco N, et al. 17q21 variant increases the risk of exacerbations in asthmatic children despite inhaled corticosteroids use. *Allergy Eur J Allergy Clin Immunol*. 2018;73(10):2083-2088.

12. Wickman M, Kull I, Pershagen G, Nordvall SL. The BAMSE project: Presentation of a prospective longitudinal birth cohort study. In: *Pediatric Allergy and Immunology, Supplement*. Vol 13. ; 2002:11-13.

13. Bisgaard H. The Copenhagen Prospective Study on Asthma in Childhood (COPSAC): Design, rationale, and baseline data from a longitudinal birth cohort study. *Ann Allergy, Asthma Immunol*. 2004;93(4):381-389.

14. Dijk FN, Vijverberg SJ, Hernandez‐Pacheco N, et al. IL1RL1 gene variations are associated with asthma exacerbations in children and adolescents using inhaled corticosteroids. *Allergy*. 2019;In press.

15. Koster ES, Raaijmakers JAM, Koppelman GH, et al. Pharmacogenetics of anti-inflammatory treatment in children with asthma: Rationale and design of the PACMAN cohort. *Pharmacogenomics*. 2009;10(8):1351-1361.

16. Turner SW, Ayres JG, MacFarlane T V., et al. A methodology to establish a database to study gene environment interactions for childhood asthma. *BMC Med Res Methodol*. 2010;10:107.

17. Hawcutt DB, Jorgensen AL, Wallin N, et al. Adrenal responses to a low-dose short synacthen test in children with asthma. *Clin Endocrinol (Oxf)*. 2015;82(5):648-656.

18. Hernandez-Pacheco N, Farzan N, Francis B, et al. Genome-wide association study of inhaled corticosteroid response in admixed children with asthma. *Clin Exp Allergy*. 2019;49(6):789-798.

19. Karimi L, Vijverberg SJH, Farzan N, Ghanbari M, Verhamme KMC, Maitland‐van der Zee AH. FCER2 T2206C variant associated with FENO levels in asthmatic children using inhaled corticosteroids: The PACMAN study. *Clin Exp Allergy*. 2019;49(11):1429-1436.

20. Wan Z, Tang Y, Song Q, et al. Gene polymorphisms in VEGFA and COL2A1 are associated with response to inhaled corticosteroids in children with asthma. *Pharmacogenomics*. 2019;20(13):947-955.

21. Levin AM, Gui H, Hernandez-Pacheco N, et al. Integrative approach identifies corticosteroid response variant in diverse populations with asthma. *J Allergy Clin Immunol*. 2019;143(5):1791-1802.

22. Wang RS, Croteau-Chonka DC, Silverman EK, Loscalzo J, Weiss ST, Hall KT. Pharmacogenomics and Placebo Response in a Randomized Clinical Trial in Asthma. *Clin Pharmacol Ther*. 2019;106(6):1261-1267.
